# Supplementary material for: Participatory Design of an Electronic Cross-Facility Health Record (ECHR) System for Pediatric Palliative Care: A Think-Aloud Study
Source: MDPI journal article supplement (doi:10.3390/children8100839), 2021-09-24
Supplement: s1 [file s1]

| Software view                   | Functions                                                                                                                                                                                                                                                                                                                                                                 | Content                                                                                                                                                                                                                                                                                                                                                                                                    | Logic                                                                                                                                                                                                                                                                                                    |
|---------------------------------|---------------------------------------------------------------------------------------------------------------------------------------------------------------------------------------------------------------------------------------------------------------------------------------------------------------------------------------------------------------------------|------------------------------------------------------------------------------------------------------------------------------------------------------------------------------------------------------------------------------------------------------------------------------------------------------------------------------------------------------------------------------------------------------------|----------------------------------------------------------------------------------------------------------------------------------------------------------------------------------------------------------------------------------------------------------------------------------------------------------|
| General aspects                 | <b>Suggestions:</b> <ul style="list-style-type: none"> <li>• free text search</li> <li>• expand and collapse fields simultaneously</li> <li>• transferring information from ECHR to medical office system</li> <li>• Reminders for appointments/need for document update</li> </ul> <b>Critic:</b> <ul style="list-style-type: none"> <li>• Long loading times</li> </ul> | <b>Suggestions:</b> <ul style="list-style-type: none"> <li>• comment field to discuss, make suggestions and clarify questions between PPC professionals</li> <li>• traceability who made entries</li> <li>• header with quick information about patients</li> </ul> <b>Critic:</b> <ul style="list-style-type: none"> <li>• Information overload due to transferred content from SOPPC and PPCU</li> </ul> | <b>Suggestions:</b> <ul style="list-style-type: none"> <li>• possibility to add content in each view</li> <li>• Permission system in which individual areas can be specifically released for users</li> </ul> <b>Critic:</b> <ul style="list-style-type: none"> <li>• Problem of jurisdiction</li> </ul> |
| Start page                      | <b>Suggestions:</b> <ul style="list-style-type: none"> <li>• Filter and sort patient list</li> </ul>                                                                                                                                                                                                                                                                      | <b>Suggestions:</b> <ul style="list-style-type: none"> <li>• Remove user-related calendar</li> </ul>                                                                                                                                                                                                                                                                                                       |                                                                                                                                                                                                                                                                                                          |
| Contact history                 | <b>Suggestions:</b> <ul style="list-style-type: none"> <li>• Opportunity to see more than three contacts</li> </ul>                                                                                                                                                                                                                                                       | <b>Suggestions:</b> <ul style="list-style-type: none"> <li>• Adapt structure of the online form</li> <li>• core data (profession, field of work) about the person entering data, the location of the contact and the reason for contact</li> </ul>                                                                                                                                                         |                                                                                                                                                                                                                                                                                                          |
| Diagnoses and findings          | <b>Suggestions:</b> <ul style="list-style-type: none"> <li>• Better visualization of diagnosis sorting → causality</li> <li>• File naming by fixed rule</li> <li>• Unlimited view of all content despite three-month view</li> <li>• Adding checkbox to appointments to make them appear in medical history</li> </ul>                                                    | <b>Suggestions:</b> <ul style="list-style-type: none"> <li>• Display of letters in medical history</li> <li>• Information about where outpatient or inpatient care took place</li> </ul> <b>Critic:</b> <ul style="list-style-type: none"> <li>• Displaying all appointments in medical history might limit clarity</li> </ul>                                                                             |                                                                                                                                                                                                                                                                                                          |
| Medication                      | <b>Suggestions:</b> <ul style="list-style-type: none"> <li>• Everyone should be able to add content</li> <li>• Possibility to create printouts / save medication view as document</li> </ul> <b>Critic:</b> <ul style="list-style-type: none"> <li>• Counterconfirmation could lead to difficulties</li> </ul>                                                            | <b>Suggestion:</b> <ul style="list-style-type: none"> <li>• Reason why medication started</li> <li>• Course of the medication</li> </ul>                                                                                                                                                                                                                                                                   | <b>Critic:</b> <ul style="list-style-type: none"> <li>• Opportunity to upload medication plan might lead to mistakes</li> </ul>                                                                                                                                                                          |
| Providers and pre-prescriptions | <b>Suggestions:</b> <ul style="list-style-type: none"> <li>• Fill in and save prescriptions digitally</li> </ul>                                                                                                                                                                                                                                                          | <b>Suggestions:</b> <ul style="list-style-type: none"> <li>• Additional information on assistive devices</li> <li>• Information on performed therapies</li> </ul>                                                                                                                                                                                                                                          |                                                                                                                                                                                                                                                                                                          |

|                    |                                                                                                                                                                                                                   |                                                                                                                                                 |                                                                                                                                                   |
|--------------------|-------------------------------------------------------------------------------------------------------------------------------------------------------------------------------------------------------------------|-------------------------------------------------------------------------------------------------------------------------------------------------|---------------------------------------------------------------------------------------------------------------------------------------------------|
| Calendar           | <b>Suggestions:</b> <ul style="list-style-type: none"> <li>• inviting people to appointments</li> <li>• Exportation of appointments to own calendar</li> <li>• Assign different colors to appointments</li> </ul> |                                                                                                                                                 |                                                                                                                                                   |
| Treatment process  | <b>Suggestions:</b> <ul style="list-style-type: none"> <li>• Expand fields by clicking on them</li> </ul>                                                                                                         | <b>Suggestions:</b> <ul style="list-style-type: none"> <li>• Field for treatment results should be named “current situation/results”</li> </ul> | <b>Suggestions:</b> <ul style="list-style-type: none"> <li>• Structure similar to organizational charts with parallel strands</li> </ul>          |
| Messaging function |                                                                                                                                                                                                                   |                                                                                                                                                 | <b>Suggestions:</b> <ul style="list-style-type: none"> <li>• Make clear, whether messaging function is patient-related or user-related</li> </ul> |
