# Supplementary material for: Participatory Design of an Electronic Cross-Facility Health Record (ECHR) System for Pediatric Palliative Care: A Think-Aloud Study
Source: Children (Basel). 2021 Sep 24;8(10):839. doi: 10.3390/children8100839 (PMC8534759; doi:10.3390/children8100839)
Supplement: Supplementary file 1 [file children-08-00839-s001.zip]

Archive with 4 entries (4 files):
- S1 ¿C Tasks CTA.pdf
- S2 ¿C Interviewguide.pdf
- S3 ¿C CTA Introduction.pdf
- S4-Feedback on the adaptation of the software.pdf
